# Supplementary material for: Research and application of excavation and anchoring machine airborne advanced exploration drilling rig
Source: Research Square preprint supplement (doi:10.21203/rs.3.rs-4200090/v1), 2024-04-12
Supplement: Supplementary file 1 [file 0fb9a221710fb33917e6c20d.xlsx]

## Sheet: Sheet1
time/h	test1/m	test2/m	test3/m	test4/m	test5/m	test6/m
0	0	0	0	0	0
0.016667	0.2888	0.2888	0	0	0.20001
0.033333	0.5776	0.5776	0.2888	0.2888	0.40002
0.05	0.8664	0.8664	0.5776	0.5776	0.60003
0.066667	0.8764	0.8764	0.5876	0.5876	0.80003
0.1	0.8864	0.8864	0.5976	0.5976	1.00004
0.116667	0.8964	0.8964	0.6076	0.6076	1.01004
0.133333	1.1852	1.1852	0.8964	0.8964	1.02004
0.15	1.47399	1.47399	1.18519	1.18519	1.03004
0.166667	1.76279	1.76279	1.47399	1.47399	1.23005
0.2	2.05159	2.05159	1.76279	1.76279	1.43006
0.216667	2.06159	2.06159	1.77279	1.77279	1.63006
0.233333	2.07159	2.07159	1.78279	1.78279	1.83007
0.25	2.08159	2.08159	1.79279	1.79279	2.03007
0.266667	2.37038	2.37038	2.08159	2.08158	2.04007
0.3	2.65918	2.65918	2.37038	2.37038	2.05007
0.316667	2.94797	2.94798	2.65918	2.65917	2.06007
0.333333	3.23677	3.23677	2.94798	2.94797	2.26008
0.35	3.24677	3.24677	2.95798	2.95797	2.46008
0.366667	3.25677	3.25677	2.96798	2.96797	2.66009
0.4	3.26677	3.26677	2.97798	2.97797	2.86009
0.416667	3.55556	3.55557	3.26677	3.26676	3.0601
0.433333	3.84435	3.84436	3.55557	3.55555	3.0701
0.45	4.13315	4.13316	3.84436	3.84434	3.0801
0.466667	4.42194	4.42195	4.13315	4.13314	3.0901
0.5	4.43194	4.43195	4.14315	4.14314	3.2901
0.516667	4.44194	4.44195	4.15315	4.15314	3.49011
0.533333	4.45194	4.45195	4.16315	4.16314	3.69011
0.55	4.74073	4.74074	4.45195	4.45193	3.89012
0.566667	5.02952	5.02953	4.74074	4.74072	4.09012
0.6	5.31831	5.31833	5.02953	5.02951	4.10012	0
0.616667	5.6071	5.60712	5.31833	5.3183	4.11012	0.2888
0.633333	5.6171	5.61712	5.32833	5.3283	4.12012	0.5776
0.65	5.6271	5.62712	5.33833	5.3383	4.32012	0.8664
0.666667	5.6371	5.63712	5.34833	5.3483	4.52013	0.8764
0.7	5.92589	5.92591	5.63712	5.63709	4.72013	0.8864
0.716667	6.21468	6.2147	5.92591	5.92588	4.92013	0.8964
0.733333	6.50347	6.50349	6.2147	6.21467	5.12013	1.1852
0.75	6.79226	6.79228	6.50349	6.50345	5.13013	1.47399
0.766667	6.80226	6.80228	6.51349	6.51345	5.14013	1.76279
0.8	6.81226	6.81228	6.52349	6.52345	5.15013	2.05159
0.816667	6.82226	6.82228	6.53349	6.53345	5.35014	2.06159
0.833333	7.11104	7.11107	6.82228	6.82224	5.55014	2.07159
0.85	7.39983	7.39986	7.11107	7.11103	5.75014	2.08159
0.866667	7.68862	7.68865	7.39986	7.39981	5.95014	2.37038
0.9	7.9774	7.97743	7.68864	7.6886	6.15014	2.65918
0.916667	7.9874	7.98743	7.69864	7.6986	6.16014	2.94797
0.933333	7.9974	7.99743	7.70864	7.7086	6.17014	3.23677
0.95	8.0074	8.00743	7.71864	7.7186	6.18014	3.24677
0.966667	8.29619	8.29622	8.00743	8.00738	6.38015	3.25677
1	8.58497	8.58501	8.29622	8.29617	6.58015	3.26677
1.01667	8.87375	8.87379	8.585	8.58495	6.78015	3.55556
1.03333	9.16254	9.16258	8.87379	8.87373	6.98015	3.84435
1.05	9.17254	9.17258	8.88379	8.88373	7.18015	4.13314
1.06667	9.18254	9.18258	8.89379	8.89373	7.19015	4.42194
1.1	9.19254	9.19258	8.90379	8.90373	7.20015	4.43194
1.11667	9.48132	9.48136	9.19257	9.19252	7.21015	4.44194
1.13333	9.7701	9.77015	9.48136	9.4813	7.41015	4.45194
1.15	10.0589	10.0589	9.77014	9.77008	7.61015	4.74073
1.16667	10.3477	10.3477	10.0589	10.0589	7.81015	5.02952
1.2	10.3577	10.3577	10.0689	10.0689	8.01015	5.31831
1.21667	10.3677	10.3677	10.0789	10.0789	8.21015	5.6071
1.23333	10.3777	10.3777	10.0889	10.0889	8.22015	5.6171
1.25	10.6664	10.6665	10.3777	10.3776	8.23015	5.6271
1.26667	10.9552	10.9553	10.6665	10.6664	8.24015	5.6371
1.3	11.244	11.2441	10.9553	10.9552	8.44015	5.92588
1.31667	11.5328	11.5328	11.244	11.244	8.64014	6.21467
1.33333	11.5428	11.5428	11.254	11.254	8.84014	6.50346
1.35	11.5528	11.5528	11.264	11.264	9.04014	6.79224
1.36667	11.5628	11.5628	11.2741	11.274	9.24014	6.80224
1.4	11.8516	11.8516	11.5628	11.5628	9.25014	6.81224
1.41667	12.1403	12.1404	11.8516	11.8515	9.26014	6.82224
1.43333	12.4291	12.4292	12.1404	12.1403	9.27014	7.11103
1.45	12.7179	12.718	12.4292	12.4291	9.47013	7.39981
1.46667	12.7279	12.728	12.4392	12.4391	9.67013	7.6886
1.5	12.7379	12.738	12.4492	12.4491	9.87013	7.97738
1.51667	12.7479	12.748	12.4592	12.4591	10.0701	7.98738
1.53333	13.0367	13.0367	12.7479	12.7479	10.2701	7.99738
1.55	13.3255	13.3255	13.0367	13.0366	10.2801	8.00738
1.56667	13.6142	13.6143	13.3255	13.3254	10.2901	8.29617
1.6	13.903	13.9031	13.6143	13.6142	10.3001	8.58495
1.61667	13.913	13.9131	13.6243	13.6242	10.5001	8.87373
1.63333	13.923	13.9231	13.6343	13.6342	10.7001	9.16252
1.65	13.933	13.9331	13.6443	13.6442	10.9001	9.17252
1.66667	14.2218	14.2218	13.933	13.933	11.1001	9.18252
1.7	14.5106	14.5106	14.2218	14.2217	11.3001	9.19252
1.71667	14.7993	14.7994	14.5106	14.5105	11.3101	9.4813
1.73333	15.0881	15.0882	14.7994	14.7993	11.3201	9.77008
1.75	15.0981	15.0982	14.8094	14.8093	11.3301	10.0589
1.76667	15.1081	15.1082	14.8194	14.8193	11.5301	10.3476
1.8	15.1181	15.1182	14.8294	14.8293	11.7301	10.3576
1.81667	15.4069	15.407	15.1181	15.1181	11.9301	10.3676
1.83333	15.6957	15.6957	15.4069	15.4068	12.1301	10.3776
1.85	15.9844	15.9845	15.6957	15.6956	12.3301	10.6664
1.86667	16.2732	16.2733	15.9845	15.9844	12.3401	10.9552
1.9	16.2832	16.2833	15.9945	15.9944	12.3501	11.244
1.91667	16.2932	16.2933	16.0045	16.0044	12.3601	11.5328
1.93333	16.3032	16.3033	16.0145	16.0144	12.5601	11.5428
1.95	16.592	16.5921	16.3032	16.3031	12.7601	11.5528
1.96667	16.8807	16.8808	16.592	16.5919	12.9601	11.5628
2	17.1695	17.1696	16.8808	16.8807	13.1601	11.8515
2.01667	17.4583	17.4584	17.1696	17.1694	13.3601	12.1403
2.03333	17.4683	17.4684	17.1795	17.1794	13.3701	12.4291
2.05	17.4783	17.4784	17.1896	17.1894	13.3801	12.7179
2.06667	17.4883	17.4884	17.1995	17.1994	13.3901	12.7279
2.1	17.777	17.7771	17.4883	17.4882	13.59	12.7379
2.11667	18.0658	18.0659	17.7771	17.777	13.7901	12.7479
2.13333	18.3546	18.3547	18.0659	18.0657	13.99	13.0366
2.15	18.6434	18.6435	18.3546	18.3545	14.19	13.3254
2.16667	18.6533	18.6534	18.3646	18.3645	14.39	13.6142
2.2	18.6634	18.6635	18.3746	18.3745	14.4	13.903
2.21667	18.6733	18.6734	18.3846	18.3845	14.41	13.913
2.23333	18.9621	18.9622	18.6734	18.6733	14.42	13.923
2.25	19.2509	19.251	18.9622	18.962	14.62	13.933
2.26667	19.5397	19.5398	19.2509	19.2508	14.82	14.2218
2.3	19.8284	19.8285	19.5397	19.5396	15.02	14.5105
2.31667	19.8384	19.8385	19.5497	19.5496	15.22	14.7993
2.33333	19.8484	19.8485	19.5597	19.5596	15.42	15.0881
2.35	19.8584	19.8585	19.5697	19.5696	15.43	15.0981
2.36667	20.1472	20.1473	19.8585	19.8583	15.44	15.1081
2.4	20.436	20.4361	20.1472	20.1471	15.45	15.1181
2.41667	20.7247	20.7248	20.436	20.4359	15.65	15.4069
2.43333	21.0135	21.0136	20.7248	20.7246	15.85	15.6956
2.45	21.0235	21.0236	20.7348	20.7346	16.05	15.9844
2.46667	21.0335	21.0336	20.7448	20.7446	16.25	16.2732
2.5	21.0435	21.0436	20.7548	20.7546	16.45	16.2832
2.51667	21.3323	21.3324	21.0435	20.9034	16.4599	16.2932
2.53333	21.621	21.6211	21.3323	21.0522	16.47	16.3032
2.55	21.9098	21.9099	21.6211	21.2009	16.4799	16.5919
2.56667	22.1986	22.1986	21.9098	21.3497	16.6799	16.8807
2.6	22.2086	22.2086	21.9198	21.3597	16.8799	17.1695
2.61667	22.2186	22.2186	21.9298	21.3697	17.0799	17.4582
2.63333	22.2286	22.2286	21.9398	21.3797	17.2799	17.4682
2.65	22.5173	22.5174	22.2286	21.5284	17.4799	17.4782
2.66667	22.8061	22.8062	22.5174	21.6772	17.4899	17.4882
2.7	23.0949	23.0949	22.8061	21.826	17.4999	17.777
2.71667	23.3836	23.3837	23.0949	21.9747	17.5099	18.0658
2.73333	23.3936	23.3937	23.1049	21.9847	17.7099	18.3545
2.75	23.4036	23.4037	23.1149	21.9947	17.9099	18.6433
2.76667	23.4136	23.4137	23.1249	22.0047	18.1099	18.6533
2.8	23.7024	23.7024	23.4136	22.1535	18.3099	18.6633
2.81667	23.9911	23.9912	23.7024	22.3022	18.5099	18.6733
2.83333	24.2799	24.28	23.9912	22.451	18.5199	18.9621
2.85	24.5687	24.5687	24.2799	22.5998	18.5299	19.2508
2.86667	24.5786	24.5787	24.2899	22.6098	18.5399	19.5396
2.9	24.5887	24.5887	24.2999	22.6198	18.7399	19.8284
2.91667	24.5986	24.5987	24.3099	22.6298	18.9398	19.8384
2.93333	24.8874	24.8875	24.5987	22.7785	19.1398	19.8484
2.95	25.1762	25.1762	24.8874	22.9273	19.3398	19.8584
2.96667	25.4649	25.465	25.1762	23.076	19.5398	20.1471
3	25.7537	25.7538	25.4649	23.2248	19.5498	20.4359
3.01667	25.7637	25.7638	25.4749	23.2348	19.5598	20.7247
3.03333	25.7737	25.7738	25.4849	23.2448	19.5698	21.0134
3.05	25.7837	25.7838	25.4949	23.2548	19.7698	21.0234
3.06667	26.0724	26.0725	25.7837	23.4035	19.9698	21.0334
3.1	26.3612	26.3613	26.0724	23.5523	20.1698	21.0434
3.11667	26.65	26.65	26.3612	23.7011	20.3698	21.3322
3.13333	26.9387	26.9388	26.65	23.8498	20.5697	21.6209
3.15	26.9487	26.9488	26.6599	23.8598	20.5797	21.9097
3.16667	26.9587	26.9588	26.67	23.8698	20.5897	22.1985
3.2	26.9687	26.9688	26.68	23.8798	20.5997	22.2084
3.21667	27.2575	27.2575	26.9687	24.0286	20.7997	22.2185
3.23333	27.5462	27.5463	27.2575	24.1773	20.9997	22.2284
3.25	27.835	27.835	27.5462	24.3261	21.1997	22.5172
3.26667	28.1237	28.1238	27.835	24.4748	21.3997	22.806
3.3	28.1337	28.1338	27.845	24.4848	21.5997	23.0947
3.31667	28.1437	28.1438	27.855	24.4948	21.6097	23.3835
3.33333	28.1537	28.1538	27.865	24.5048	21.6197	23.3935
3.35	28.4425	28.4426	28.1537	24.6536	21.6297	23.4035
3.36667	28.7312	28.7313	28.4425	24.8023	21.8297	23.4135
3.4	29.02	29.0201	28.7312	24.9511	22.0297	23.7022
3.41667	29.3087	29.3088	29.02	25.0998	22.2296	23.991
3.43333	29.3188	29.3188	29.03	25.1098	22.4296	24.2797
3.45	29.3287	29.3288	29.04	25.1198	22.6296	24.5685
3.46667	29.3388	29.3388	29.05	25.1298	22.6396	24.5785
3.5	29.6275	29.6276	29.1987	25.2786	22.6496	24.5885
3.51667	29.9163	29.9163	29.3475	25.4273	22.6596	24.5985
3.53333	30.205	30.2051	29.4962	25.5761	22.8596	24.8873
3.55	30.4938	30.4938	29.645	25.7248	23.0596	25.176
3.56667	30.5038	30.5038	29.655	25.7348	23.2596	25.4647
3.6	30.5138	30.5138	29.665	25.7448	23.4596	25.7535
3.61667	30.5238	30.5238	29.675	25.7548	23.6595	25.7635
3.63333	30.8125	30.8126	29.8237	25.9036	23.6695	25.7735
3.65	31.1013	31.1013	29.9725	26.0523	23.6795	25.7835
3.66667	31.39	31.3901	30.1212	26.2011	23.6895	26.0723
3.7	31.6788	31.6788	30.27	26.3498	23.8895	26.361
3.71667	31.6887	31.6888	30.2799	26.3598	24.0895	26.6498
3.73333	31.6988	31.6988	30.29	26.3698	24.2895	26.9385
3.75	31.7087	31.7088	30.2999	26.3798	24.4895	26.9485
3.76667	31.9975	31.9976	30.4487	26.5286	24.6895	26.9585
3.8	32.2863	32.2863	30.5974	26.6773	24.6995	26.9685
3.81667	32.575	32.575	30.7462	26.8261	24.7095	27.2573
3.83333	32.8637	32.8638	30.8949	26.9748	24.7195	27.546
3.85	32.8737	32.8738	30.9049	26.9848	24.9195	27.8348
3.86667	32.8837	32.8838	30.9149	26.9948	25.1194	28.1235
3.9	32.8937	32.8938	30.9249	27.0048	25.3194	28.1335
3.91667	33.1825	33.1825	31.0737	27.1535	25.5194	28.1435
3.93333	33.4712	33.4713	31.2224	27.3023	25.7194	28.1535
3.95	33.76	33.76	31.3712	27.451	25.7294	28.4423
3.96667	34.0487	34.0488	31.5199	27.5998	25.7394	28.731
4	34.0587	34.0588	31.5299	27.6098	25.7494	29.0197
4.01667	34.0687	34.0688	31.5399	27.6198	25.9494	29.3085
4.03333	34.0787	34.0788	31.5499	27.6298	26.1493	29.3185
4.05	34.3674	34.3675	31.6987	27.7785	26.3493	29.3285
4.06667	34.6562	34.6563	31.8474	27.9273	26.5493	29.3385
4.1	34.9449	34.945	31.9962	28.076	26.7493	29.6272
4.11667	35.2337	35.2337	32.1449	28.2247	26.7593	29.916
4.13333	35.2437	35.2437	32.1549	28.2347	26.7693	30.2047
4.15	35.2537	35.2537	32.1649	28.2447	26.7793	30.4935
4.16667	35.2637	35.2637	32.1749	28.2547	26.9793	30.5035
4.2	35.5524	35.5525	32.3236	28.4035	27.1793	30.5135
4.21667	35.8411	35.8412	32.4724	28.5522	27.3792	30.5235
4.23333	36.1299	36.13	32.6211	28.701	27.5792	30.8122
4.25	36.4186	36.4187	32.7699	28.8497	27.7792	31.101
4.26667	36.4286	36.4287	32.7799	28.8597	27.7892	31.3897
4.3	36.4386	36.4387	32.7899	28.8697	27.7992	31.6785
4.31667	36.4486	36.4487	32.7999	28.8797	27.8092	31.6884
4.33333	36.7374	36.7374	32.9486	29.0284	28.0092	31.6985
4.35	37.0261	37.0262	33.0973	29.1772	28.2092	31.7084
4.36667	37.3148	37.3149	33.2461	29.3259	28.4092	31.9972
4.4	37.6036	37.6037	33.3948	29.4747	28.6091	32.2859
4.41667	37.6136	37.6136	33.4048	29.4846	28.8091	32.5747
4.43333	37.6236	37.6236	33.4148	29.4947	28.8191	32.8634
4.45	37.6336	37.6337	33.4248	29.5047	28.8291	32.8734
4.46667	37.9223	37.9224	33.5736	29.6534	28.8391	32.8834
4.5	38.2111	38.2111	33.7223	29.8021	29.0391	32.8934
4.51667	38.4998	38.4999	33.871	29.9509	29.2391	33.1822
4.53333	38.7885	38.7886	34.0198	30.0996	29.4391	33.4709
4.55	38.7985	38.7986	34.0298	30.1096	29.639	33.7596
4.56667	38.8085	38.8086	34.0398	30.1196	29.839	34.0484
4.6	38.8185	38.8186	34.0498	30.1296	29.849	34.0584
4.61667	39.1073	39.1073	34.1985	30.2783	29.859	34.0684
4.63333	39.396	39.3961	34.3473	30.4271	29.869	34.0784
4.65	39.6847	39.6848	34.496	30.5758	30.069	34.3671
4.66667	39.9735	39.9735	34.6447	30.7245	30.269	34.6559
4.7	39.9835	39.9835	34.6547	30.7345	30.469	34.9446
4.71667	39.9935	39.9935	34.6647	30.7445	30.6689	35.2333
4.73333	40.0035	40.0035	34.6747	30.7545	30.8689	35.2433
4.75	40.2922	40.2923	34.8235	30.9032	30.8789	35.2533
4.76667	40.5809	40.581	34.9722	31.052	30.8889	35.2633
4.8	40.8697	40.8697	35.1209	31.2007	30.8989	35.5521
4.81667	41.1584	41.1585	35.2697	31.3495	31.0989	35.8408
4.83333	41.1684	41.1685	35.2797	31.3594	31.2989	36.1295
4.85	41.1784	41.1785	35.2897	31.3695	31.4989	36.4183
4.86667	41.1884	41.1885	35.2997	31.3794	31.6988	36.4283
4.9	41.4771	41.3372	35.4484	31.5282	31.8988	36.4383
4.91667	41.7659	41.4859	35.5971	31.6769	31.9088	36.4483
4.93333	42.0546	41.6347	35.7459	31.8256	31.9188	36.737
4.95	42.3433	41.7834	35.8946	31.9744	31.9288	37.0257
4.96667	42.3533	41.7934	35.9046	31.9844	32.1288	37.3145
5	42.3633	41.8034	35.9146	31.9944	32.3288	37.6032
5.01667	42.3733	41.8134	35.9246	32.0044	32.5287	37.6132
5.03333	42.662	41.9621	36.0733	32.1531	32.7287	37.6232
5.05	42.9508	42.1108	36.2221	32.3018	32.9287	37.6332
5.06667	43.2395	42.2596	36.3708	32.4505	32.9387	37.9219
5.1	43.5282	42.4083	36.5195	32.5993	32.9487	38.2106
5.11667	43.5382	42.4183	36.5295	32.6093	32.9587	38.4994
5.13333	43.5482	42.4283	36.5395	32.6193	33.1587	38.7881
5.15	43.5582	42.4383	36.5495	32.6293	33.3586	38.7981
5.16667	43.8469	42.587	36.6983	32.778	33.5586	38.8081
5.2	44.1357	42.7358	36.847	32.9267	33.7586	38.8181
5.21667	44.4244	42.8845	36.9957	33.0754	33.9586	39.1068
5.23333	44.7131	43.0332	37.1444	33.2242	33.9686	39.3956
5.25	44.7231	43.0432	37.1544	33.2342	33.9786	39.6843
5.26667	44.7331	43.0532	37.1644	33.2442	33.9886	39.973
5.3	44.7431	43.0632	37.1744	33.2542	34.1885	39.983
5.31667	45.0318	43.2119	37.3232	33.4029	34.3885	39.993
5.33333	45.3206	43.3607	37.4719	33.5516	34.5885	40.003
5.35	45.6093	43.5094	37.6206	33.7003	34.7885	40.2917
5.36667	45.898	43.6581	37.7693	33.8491	34.9885	40.5804
5.4	45.908	43.6681	37.7793	33.8591	34.9984	40.8692
5.41667	45.918	43.6781	37.7893	33.8691	35.0085	41.1579
5.43333	45.928	43.6881	37.7993	33.8791	35.0185	41.1679
5.45	46.2167	43.8368	37.9481	34.0278	35.2184	41.1779
5.46667	46.5055	43.9856	38.0968	34.1765	35.4184	41.1879
5.5	46.7942	44.1343	38.2455	34.3252	35.6184	41.4766
5.51667	47.0829	44.283	38.3942	34.474	35.8184	41.7653
5.53333	47.0929	44.293	38.4042	34.484	36.0183	42.0541
5.55	47.1029	44.303	38.4142	34.4939	36.0283	42.3428
5.56667	47.1129	44.313	38.4242	34.504	36.0383	42.3528
5.6	47.4016	44.4617	38.573	34.6527	36.0483	42.3628
5.61667	47.6904	44.6105	38.7217	34.8014	36.2483	42.3728
5.63333	47.9791	44.7592	38.8704	34.9501	36.4483	42.6615
5.65	48.2678	44.9079	39.0191	35.0988	36.6482	42.9502
5.66667	48.2778	44.9179	39.0291	35.1088	36.8482	43.2389
5.7	48.2878	44.9279	39.0391	35.1188	37.0482	43.5277
5.71667	48.2978	44.9379	39.0491	35.1288	37.0582	43.5377
5.73333	48.5865	45.0866	39.1979	35.2775	37.0682	43.5477
5.75	48.8752	45.2353	39.3466	35.4263	37.0782	43.5577
5.76667	49.1639	45.3841	39.4953	35.575	37.2782	43.8464
5.8	49.4527	45.5328	39.644	35.7237	37.4781	44.1351
5.81667	49.4627	45.5428	39.654	35.7337	37.6781	44.4238
5.83333	49.4727	45.5528	39.664	35.7437	37.8781	44.7125
5.85	49.4827	45.5628	39.674	35.7537	38.078	44.7225
5.86667	49.7714	45.7115	39.8227	35.9024	38.0881	44.7325
5.9	50.0601	45.8602	39.9714	36.0511	38.0981	44.7425
5.91667	50.3488	46.0089	40.1202	36.1998	38.108	45.0312
5.93333	50.6375	46.1576	40.2689	36.3486	38.308	45.32
5.95	50.6475	46.1677	40.2789	36.3586	38.508	45.6087
5.96667	50.6575	46.1776	40.2889	36.3686	38.708	45.8974
6	50.6675	46.1876	40.2989	36.3786	38.9079	45.9074
6.01667	50.9562	46.3364	40.4476	36.5273	39.1079	45.9174
6.03333	51.245	46.4851	40.5963	36.676	39.1179	45.9274
6.05	51.5337	46.6338	40.745	36.8247	39.1279	46.2161
6.06667	51.8224	46.7825	40.8937	36.9734	39.1379	46.5048
6.1	51.8324	46.7925	40.9038	36.9834	39.3379	46.7936
6.11667	51.8424	46.8025	40.9138	36.9934	39.5378	47.0823
6.13333	51.8524	46.8125	40.9237	37.0034	39.7378	47.0923
6.15	52.1411	46.9612	41.0725	37.1521	39.9378	47.1023
6.16667	52.4298	47.1099	41.2212	37.3008	40.1378	47.1123
6.2	52.7185	47.2587	41.3699	37.4495	40.1478	47.401
6.21667	53.0072	47.4074	41.5186	37.5983	40.1578	47.6897
6.23333	53.0172	47.4174	41.5286	37.6082	40.1678	47.9784
6.25	53.0272	47.4274	41.5386	37.6183	40.3677	48.2671
6.26667	53.0372	47.4374	41.5486	37.6283	40.5677	48.2771
6.3	53.3259	47.5861	41.6973	37.777	40.7677	48.2871
6.31667	53.6146	47.7348	41.846	37.9257	40.9676	48.2971
6.33333	53.9034	47.8835	41.9948	38.0744	41.1676	48.5858
6.35	54.1921	48.0322	42.1435	38.2231	41.1776	48.8745
6.36667	54.2021	48.0422	42.1535	38.2331	41.1876	49.1632
6.4	54.2121	48.0522	42.1635	38.2431	41.1976	49.452
6.41667	54.2221	48.0622	42.1735	38.2531	41.3976	49.462
6.43333	54.5108	48.2109	42.3222	38.4018	41.5975	49.472
6.45	54.7995	48.3596	42.4709	38.5505	41.7975	49.482
6.46667	55.0882	48.5084	42.6196	38.6992	41.9975	49.7707
6.5	55.3769	48.6571	42.7683	38.8479	42.1975	50.0594
6.51667	55.3869	48.6671	42.7783	38.8579	42.2075	50.3481
6.53333	55.3969	48.6771	42.7883	38.8679	42.2175	50.6368
6.55	55.4069	48.6871	42.7983	38.8779	42.2275	50.6468
6.56667	55.6956	48.8358	42.947	39.0266	42.4274	50.6568
6.6	55.9843	48.9845	43.0957	39.1753	42.6274	50.6668
6.61667	56.273	49.1332	43.2445	39.324	42.8274	50.9555
6.63333	56.5617	49.2819	43.3932	39.4727	43.0273	51.2442
6.65	56.5717	49.2919	43.4032	39.4827	43.2273	51.5329
6.66667	56.5817	49.3019	43.4132	39.4927	43.2373	51.8216
6.7	56.5917	49.3119	43.4232	39.5027	43.2473	51.8316
6.71667	56.8804	49.4606	43.5719	39.6514	43.2573	51.8416
6.73333	57.1691	49.6093	43.7206	39.8002	43.4573	51.8516
6.75	57.4578	49.758	43.8693	39.9489	43.6572	52.1403
6.76667	57.7465	49.9067	44.018	40.0976	43.8572	52.429
6.8	57.7565	49.9167	44.028	40.1076	44.0572	52.7177
6.81667	57.7665	49.9267	44.038	40.1176	44.2571	53.0065
6.83333	57.7765	49.9367	44.048	40.1276	44.2671	53.0164
6.85	58.0652	50.0854	44.1967	40.2763	44.2771	53.0264
6.86667	58.3539	50.2341	44.3454	40.425	44.2871	53.0365
6.9	58.6426	50.3829	44.4941	40.5737	44.4871	53.3252
6.91667	58.9313	50.5316	44.6428	40.7224	44.6871	53.6139
6.93333	58.9413	50.5416	44.6528	40.7324	44.887	53.9026
6.95	58.9513	50.5516	44.6628	40.7424	45.087	54.1913
6.96667	58.9613	50.5616	44.6728	40.7524	45.2869	54.2013
7	59.2501	50.7103	44.8215	40.9011	45.297	54.2113
7.01667	59.5388	50.859	44.9702	41.0498	45.307	54.2213
7.03333	59.8274	51.0077	45.1189	41.1985	45.3169	54.51
7.05	60.1161	51.1564	45.2677	41.3472	45.5169	54.7987
7.06667	60.1262	51.1664	45.2777	41.3572	45.7169	55.0874
7.1	60.1362	51.1764	45.2876	41.3672	45.9168	55.3761
7.11667	60.1461	51.1864	45.2976	41.3772	46.1168	55.3861
7.13333	60.4348	51.3351	45.4464	41.5259	46.3168	55.3961
7.15	60.7236	51.4838	45.5951	41.6746	46.3268	55.4061
7.16667	61.0123	51.6325	45.7438	41.8233	46.3368	55.6948
7.2	61.301	51.7812	45.8925	41.972	46.3468	55.9835
7.21667	61.311	51.7912	45.9025	41.982	46.5467	56.2722
7.23333	61.321	51.8012	45.9125	41.992	46.7467	56.5609
7.25	61.331	51.8112	45.9225	42.002	46.9467	56.5709
7.26667	61.6197	51.9599	46.0712	42.1506	47.1466	56.5809
7.3	61.9083	52.1086	46.2199	42.2993	47.3466	56.5909
7.31667	62.197	52.2573	46.3686	42.4481	47.3566	56.8796
7.33333	62.4858	52.406	46.5173	42.5967	47.3666	57.1683
7.35	62.4958	52.416	46.5273	42.6067	47.3766	57.457
7.36667	62.5057	52.426	46.5373	42.6167	47.5766	57.7457
7.4	62.5157	52.436	46.5473	42.6267	47.7765	57.7557
7.41667	62.8045	52.5847	46.696	42.7754	47.9765	57.7657
7.43333	63.0932	52.7334	46.8447	42.9241	48.1764	57.7757
7.45	63.3818	52.8821	46.9934	43.0728	48.3764	58.0644
7.46667	63.6705	53.0308	47.1421	43.2215	48.3864	58.3531
7.5	63.6805	53.0408	47.1521	43.2315	48.3964	58.6418
7.51667	63.6905	53.0508	47.1621	43.2415	48.4064	58.9305
7.53333	63.7005	53.0608	47.1721	43.2515	48.6064	58.9405
7.55	63.9892	53.2095	47.3208	43.4002	48.8063	58.9505
7.56667	64.2779	53.3582	47.4695	43.5489	49.0063	58.9605
7.6	64.5666	53.5069	47.6182	43.6976	49.2062	59.2492
7.61667	64.8553	53.6556	47.7669	43.8463	49.4062	59.5379
7.63333	64.8653	53.6656	47.7769	43.8563	49.4162	59.8265
7.65	64.8753	53.6756	47.7869	43.8663	49.4262	60.1153
7.66667	64.8853	53.6856	47.7969	43.8763	49.4362	60.1253
7.7	65.174	53.8343	47.9456	44.025	49.6362	60.1352
7.71667	65.4627	53.983	48.0943	44.1737	49.8361	60.1452
7.73333	65.7514	54.1317	48.243	44.3224	50.0361	60.4339
7.75	66.0401	54.2804	48.3917	44.4711	50.236	60.7226
7.76667	66.0501	54.2904	48.4017	44.4811	50.436	61.0113
7.8	66.0601	54.3004	48.4117	44.4911	50.446	61.3
7.81667	66.0701	54.3104	48.4217	44.5011	50.456	61.31
7.83333	66.3588	54.4591	48.5703	44.6497	50.466	61.32
7.85	66.6475	54.6078	48.7191	44.7984	50.666	61.33
7.86667	66.9362	54.7565	48.8677	44.9471	50.8659	61.6187
7.9	67.2249	54.9051	49.0164	45.0958	51.0659	61.9074
7.91667	67.2349	54.9151	49.0264	45.1058	51.2659	62.1961
7.93333	67.2449	54.9251	49.0364	45.1158	51.4658	62.4848
7.95	67.2549	54.9351	49.0464	45.1258	51.4758	62.4948
7.96667	67.5436	55.0838	49.1951	45.2745	51.4858	62.5048
8	67.8323	55.2325	49.3438	45.4232	51.4958	62.5148
8.01667	68.1209	55.3812	49.4925	45.5719	51.6958	62.8035
8.03333	68.4096	55.5299	49.6412	45.7206	51.8957	63.0922
8.05	68.4196	55.5399	49.6512	45.7306	52.0957	63.3809
8.06667	68.4296	55.5499	49.6612	45.7406	52.2956	63.6696
8.1	68.4396	55.5599	49.6712	45.7506	52.4956	63.6795
8.11667	68.7283	55.7086	49.8199	45.8993	52.5056	63.6895
8.13333	69.017	55.8573	49.9686	46.0479	52.5156	63.6996
8.15	69.3057	56.006	50.1173	46.1966	52.5256	63.9882
8.16667	69.5944	56.1547	50.266	46.3453	52.7255	64.2769
8.2	69.6044	56.1647	50.276	46.3553	52.9255	64.5656
8.21667	69.6144	56.1747	50.286	46.3653	53.1255	64.8543
8.23333	69.6244	56.1847	50.296	46.3753	53.3254	64.8643
8.25	69.9131	56.3334	50.4447	46.524	53.5254	64.8743
8.26667	70.2018	56.482	50.5933	46.6727	53.5354	64.8843
8.3	70.4904	56.6307	50.742	46.8214	53.5454	65.173
8.31667	70.7791	56.7794	50.8907	46.9701	53.5554	65.4617
8.33333	70.7891	56.7894	50.9007	46.98	53.7553	65.7503
8.35	70.7991	56.7994	50.9107	46.99	53.9553	66.039
8.36667	70.8091	56.8094	50.9207	47.0001	54.1553	66.049
8.4	71.0978	56.9581	51.0694	47.1487	54.3552	66.059
8.41667	71.3865	57.1068	51.2181	47.2974	54.5552	66.069
8.43333	71.6752	57.2555	51.3668	47.4461	54.5652	66.3577
8.45	71.9639	57.4042	51.5155	47.5948	54.5752	66.6464
8.46667	71.9739	57.4142	51.5255	47.6048	54.5852	66.9351
8.5	71.9839	57.4242	51.5355	47.6148	54.7851	67.2238
8.51667	71.9939	57.4342	51.5455	47.6248	54.9851	67.2338
8.53333	72.2826	57.5828	51.6942	47.7735	55.185	67.2438
8.55	72.5712	57.7315	51.8428	47.9221	55.385	67.2538
8.56667	72.8599	57.8802	51.9915	48.0708	55.5849	67.5425
8.6	73.1486	58.0289	52.1402	48.2195	55.5949	67.8311
8.61667	73.1586	58.0389	52.1502	48.2295	55.6049	68.1198
8.63333	73.1686	58.0489	52.1602	48.2395	55.6149	68.4085
8.65	73.1786	58.0589	52.1702	48.2495	55.6849	68.4185
8.66667	73.4673	58.2076	52.3189	48.3982	55.7548	68.4285
8.7	73.756	58.3563	52.4676	48.5468	55.8248	68.4385
8.71667	74.0447	58.5049	52.6163	48.6955	55.8948	68.7272
8.73333	74.3333	58.6536	52.7649	48.8442	55.9647	69.0158
8.75	74.3433	58.6636	52.7749	48.8542	55.9747	69.3045
8.76667	74.3533	58.6736	52.7849	48.8642	55.9847	69.5932
8.8	74.3633	58.6836	52.7949	48.8742	55.9947	69.6032
8.81667	74.652	58.8323	52.9436	49.0229	56.0647	69.6132
8.83333	74.9407	58.981	53.0923	49.1716	56.1346	69.6232
8.85	75.2294	59.1297	53.241	49.3202	56.2046	69.9119
8.86667	75.5181	59.2783	53.3897	49.4689	56.2745	70.2006
8.9	75.528	59.2883	53.3997	49.4789	56.3445	70.4892
8.91667	75.538	59.2983	53.4096	49.4889	56.3545	70.7779
8.93333	75.5481	59.3083	53.4196	49.4989	56.3645	70.7879
8.95	75.8367	59.457	53.5683	49.6476	56.3745	70.7979
8.96667	76.1254	59.6057	53.717	49.7963	56.4444	70.8079
9	76.4141	59.7544	53.8657	49.9449	56.5144	71.0966
9.01667	76.7028	59.9031	54.0144	50.0936	56.5843	71.3853
9.03333	76.7128	59.9131	54.0244	50.1036	56.6543	71.6739
9.05	76.7228	59.9231	54.0344	50.1136	56.7242	71.9626
9.06667	76.7328	59.9331	54.0444	50.1236	56.7342	71.9726
9.1	77.0214	60.0817	54.193	50.2723	56.7442	71.9826
9.11667	77.3101	60.2304	54.3417	50.4209	56.7542	71.9926
9.13333	77.5988	60.3791	54.4904	50.5696	56.8242	72.2813
9.15	77.8875	60.5278	54.6391	50.7183	56.8941	72.57
9.16667	77.8975	60.5378	54.6491	50.7283	56.9641	72.8586
9.2	77.9075	60.5478	54.6591	50.7383	57.034	73.1473
9.21667	77.9175	60.5578	54.6691	50.7483	57.104	73.1573
9.23333	78.2061	60.7064	54.8178	50.897	57.114	73.1673
9.25	78.4948	60.8551	54.9664	51.0456	57.124	73.1773
9.26667	78.7835	61.0038	55.1151	51.1943	57.134	73.466
9.3	79.0722	61.1525	55.2638	51.343	57.2039	73.7546
9.31667	79.0822	61.1625	55.2738	51.353	57.2739	74.0433
9.33333	79.0922	61.1725	55.2838	51.363	57.3438	74.332
9.35	79.1022	61.1825	55.2938	51.373	57.4138	74.342
9.36667	79.3908	61.3311	55.4425	51.5216	57.4837	74.352
9.4	79.6795	61.4798	55.5911	51.6703	57.4937	74.362
9.41667	79.9682	61.6285	55.7398	51.819	57.5037	74.6506
9.43333	80.2569	61.7771	55.8885	51.9676	57.5137	74.9393
9.45	80.2669	61.7871	55.8985	51.9776	57.5837	75.228
9.46667	80.2768	61.7972	55.9085	51.9876	57.6536	75.5166
9.5	80.2869	61.8072	55.9185	51.9976	57.7236	75.5267
9.51667	80.5755	61.9558	56.0671	52.1463	57.7935	75.5366
9.53333	80.8642	62.1045	56.2158	52.295	57.8635	75.5466
9.55	81.1529	62.2532	56.3645	52.4436	57.8735	75.8353
9.56667	81.4415	62.4018	56.5132	52.5923	57.8835	76.124
9.6	81.4515	62.4118	56.5232	52.6023	57.8935	76.4126
9.61667	81.4615	62.4218	56.5332	52.6123	57.9634	76.7013
9.63333	81.4715	62.4318	56.5432	52.6223	58.0334	76.7113
9.65	81.7602	62.5805	56.6918	52.771	58.1033	76.7213
9.66667	82.0489	62.7292	56.8405	52.9196	58.1733	76.7313
9.7	82.3375	62.8779	56.9892	53.0683	58.2432	77.02
9.71667	82.6262	63.0265	57.1378	53.2169	58.2532	77.3086
9.73333	82.6362	63.0365	57.1478	53.227	58.2632	77.5973
9.75	82.6462	63.0465	57.1578	53.237	58.2732	77.886
9.76667	82.6562	63.0565	57.1678	53.2469	58.3432	77.896
9.8	82.9449	63.2052	57.3165	53.3956	58.4131	77.906
9.81667	83.2335	63.3539	57.4652	53.5443	58.4831	77.916
9.83333	83.5222	63.5025	57.6138	53.6929	58.553	78.2046
9.85	83.8109	63.6512	57.7625	53.8416	58.623	78.4933
9.86667	83.8209	63.6612	57.7725	53.8516	58.633	78.782
9.9	83.8309	63.6712	57.7825	53.8616	58.6429	79.0706
9.91667	83.8409	63.6812	57.7925	53.8716	58.6529	79.0806
9.93333	84.1295	63.8299	57.9412	54.0202	58.7229	79.0906
9.95	84.4182	63.9785	58.0898	54.1689	58.7928	79.1006
9.96667	84.7069	64.1272	58.2385	54.3176	58.8628	79.3893
10	84.9955	64.2759	58.3872	54.4662	58.9327	79.6779
10.0167	85.0055	64.2858	58.3972	54.4762	59.0027	79.9666
10.0333	85.0155	64.2959	58.4072	54.4862	59.0127	80.2553
10.05	85.0255	64.3059	58.4172	54.4962	59.0227	80.2653
10.0667	85.3142	64.4545	58.5658	54.6449	59.0327	80.2753
10.1	85.6029	64.6032	58.7145	54.7935	59.1026	80.2853
10.1167	85.8915	64.7518	58.8632	54.9422	59.1726	80.5739
10.1333	86.1802	64.9005	59.0118	55.0909	59.2425	80.8626
10.15	86.1902	64.9105	59.0218	55.1009	59.3124	81.1512
10.1667	86.2002	64.9205	59.0318	55.1108	59.3824	81.4399
10.2	86.2102	64.9305	59.0418	55.1208	59.3924	81.4499
10.2167	86.4988	65.0792	59.1905	55.2695	59.4024	81.4599
10.2333	86.7875	65.2278	59.3392	55.4182	59.4124	81.4699
10.25	87.0761	65.3765	59.4878	55.5668	59.4823	81.7586
10.2667	87.3648	65.5251	59.6365	55.7155	59.5523	82.0472
10.3	87.3748	65.5352	59.6465	55.7255	59.6222	82.3359
10.3167	87.3848	65.5452	59.6565	55.7355	59.6922	82.6245
10.3333	87.3948	65.5551	59.6665	55.7455	59.7621	82.6345
10.35	87.6835	65.7038	59.8151	55.8941	59.7721	82.6445
10.3667	87.9721	65.8525	59.9638	56.0428	59.7821	82.6545
10.4	88.2608	66.0011	60.1125	56.1914	59.7921	82.9432
10.4167	88.5494	66.1498	60.2611	56.3401	59.862	83.2318
10.4333	88.5594	66.1598	60.2711	56.3501	59.932	83.5205
10.45	88.5694	66.1698	60.2811	56.3601	60.0019	83.8092
10.4667	88.5794	66.1798	60.2911	56.3701	60.0719	83.8191
10.5	88.8681	66.3285	60.4398	56.5187	60.1418	83.8291
10.5167	89.1568	66.4771	60.5884	56.6674	60.1518	83.8392
10.5333	89.4454	66.6258	60.7371	56.816	60.1618	84.1278
10.55	89.7341	66.7744	60.8858	56.9647	60.1718	84.4164
10.5667	89.7441	66.7844	60.8957	56.9747	60.2417	84.7051
10.6	89.7541	66.7944	60.9057	56.9847	60.3117	84.9938
10.6167	89.7641	66.8044	60.9158	56.9947	60.3816	85.0038
10.6333	90.0527	66.9531	61.0644	57.1433	60.4516	85.0138
10.65	90.3414	67.1017	61.2131	57.292	60.5215	85.0238
10.6667	90.63	67.2504	61.3617	57.4406	60.5315	85.3124
10.7	90.9187	67.399	61.5104	57.5893	60.5415	85.6011
10.7167	90.9287	67.409	61.5204	57.5993	60.5515	85.8897
10.7333	90.9387	67.419	61.5304	57.6093	60.6214	86.1784
10.75	90.9487	67.429	61.5404	57.6193	60.6914	86.1884
10.7667	91.2373	67.5777	61.689	57.7679	60.7613	86.1984
10.8	91.526	67.7263	61.8377	57.9166	60.8312	86.2084
10.8167	91.8146	67.875	61.9863	58.0652	60.9012	86.497
10.8333	92.1033	68.0237	62.135	58.2139	60.9112	86.7857
10.85	92.1133	68.0336	62.145	58.2238	60.9212	87.0743
10.8667	92.1233	68.0436	62.155	58.2338	60.9312	87.3629
10.9	92.1333	68.0537	62.165	58.2439	61.0011	87.373
10.9167	92.4219	68.2023	62.3136	58.3925	61.0711	87.3829
10.9333	92.7106	68.351	62.4623	58.5411	61.141	87.3929
10.95	92.9992	68.4996	62.6109	58.6898	61.2109	87.6816
10.9667	93.2879	68.6483	62.7596	58.8384	61.2809	87.9702
11	93.2979	68.6583	62.7696	58.8484	61.2909	88.2589
11.0167	93.3079	68.6683	62.7796	58.8584	61.3009	88.5475
11.0333	93.3179	68.6783	62.7896	58.8684	61.3109	88.5575
11.05	93.6065	68.8269	62.9382	59.0171	61.3808	88.5675
11.0667	93.8952	68.9755	63.0869	59.1657	61.4507	88.5775
11.1	94.1838	69.1242	63.2355	59.3143	61.5207	88.8662
11.1167	94.4724	69.2729	63.3842	59.463	61.5906	89.1548
11.1333	94.4825	69.2828	63.3942	59.473	61.6606	89.4435
11.15	94.4925	69.2929	63.4042	59.483	61.6705	89.7321
11.1667	94.5024	69.3029	63.4142	59.493	61.6805	89.7421
11.2	94.7911	69.4515	63.5628	59.6416	61.6906	89.7521
11.2167	95.0797	69.6001	63.7115	59.7903	61.7605	89.7621
11.2333	95.3684	69.7488	63.8601	59.9389	61.8304	90.0508
11.25	95.657	69.8974	64.0088	60.0875	61.9004	90.3394
11.2667	95.667	69.9074	64.0187	60.0975	61.9703	90.6281
11.3	95.677	69.9174	64.0288	60.1075	62.0402	90.9167
11.3167	95.687	69.9274	64.0387	60.1175	62.0502	90.9267
11.3333	95.9757	70.0761	64.1874	60.2662	62.0602	90.9367
11.35	96.2643	70.2247	64.336	60.4148	62.0702	90.9467
11.3667	96.5529	70.3734	64.4847	60.5635	62.1401	91.2353
11.4	96.8416	70.522	64.6333	60.7121	62.2101	91.524
11.4167	96.8516	70.532	64.6433	60.7221	62.28	91.8126
11.4333	96.8616	70.542	64.6533	60.7321	62.35	92.1012
11.45	96.8716	70.552	64.6633	60.7421	62.4199	92.1112
11.4667	97.1602	70.7006	64.812	60.8907	62.4299	92.1213
11.5	97.4489	70.8493	64.9606	61.0394	62.4399	92.1312
11.5167	97.7375	70.9979	65.1093	61.188	62.4499	92.4199
11.5333	98.0262	71.1466	65.2579	61.3366	62.5198	92.7085
11.55	98.0362	71.1566	65.2679	61.3466	62.5898	92.9972
11.5667	98.0462	71.1666	65.2779	61.3566	62.6597	93.2858
11.6	98.0562	71.1766	65.2879	61.3666	62.7296	93.2958
11.6167	98.3448	71.3252	65.4365	61.5153	62.7996	93.3058
11.6333	98.6334	71.4739	65.5852	61.6639	62.8096	93.3158
11.65	98.9221	71.6225	65.7338	61.8125	62.8195	93.6044
11.6667	99.2107	71.7711	65.8825	61.9612	62.8295	93.8931
11.7	99.2207	71.7811	65.8925	61.9712	62.8995	94.1817
11.7167	99.2307	71.7911	65.9025	61.9812	62.9694	94.4703
11.7333	99.2407	71.8011	65.9125	61.9912	63.0393	94.4803
11.75	99.5294	71.9498	66.0611	62.1398	63.1093	94.4903
11.7667	99.818	72.0984	66.2097	62.2884	63.1792	94.5003
11.8	100.107	72.2471	66.3584	62.4371	63.1892	94.789
11.8167	100.395	72.3957	66.507	62.5857	63.1992	95.0776
11.8333	100.405	72.4057	66.517	62.5957	63.2092	95.3662
11.85		72.4157	66.527	62.6057	63.2792	95.6549
11.8667		72.4257	66.537	62.6157	63.3491	95.6649
11.9		72.5743	66.6856	62.7643	63.419	95.6749
11.9167		72.723	66.8343	62.913	63.4889	95.6849
11.9333		72.8716	66.9829	63.0616	63.5589	95.9735
11.95		73.0202	67.1316	63.2102	63.5689	96.2621
11.9667		73.0302	67.1416	63.2202	63.5789	96.5508
12		73.0402	67.1516	63.2302	63.5889	96.8394
12.0167		73.0502	67.1616	63.2402	63.6588	96.8494
12.0333		73.1989	67.3102	63.3888	63.7287	96.8594
12.05		73.3475	67.4588	63.5375	63.7987	96.8694
12.0667		73.4962	67.6075	63.6861	63.8686	97.158
12.1		73.6448	67.7561	63.8347	63.9385	97.4467
12.1167		73.6548	67.7661	63.8447	63.9485	97.7353
12.1333		73.6648	67.7761	63.8547	63.9585	98.0239
12.15		73.6748	67.7861	63.8647	63.9685	98.0339
12.1667		73.8234	67.9347	64.0133	64.0384	98.0439
12.2		73.9721	68.0834	64.162	64.1084	98.0539
12.2167		74.1207	68.232	64.3106	64.1783	98.3425
12.2333		74.2693	68.3806	64.4592	64.2482	98.6312
12.25		74.2793	68.3906	64.4692	64.3182	98.9198
12.2667		74.2893	68.4006	64.4792	64.3282	99.2084
12.3		74.2993	68.4106	64.4892	64.3382	99.2184
12.3167		74.448	68.5593	64.6378	64.3482	99.2284
12.3333		74.5966	68.7079	64.7865	64.4181	99.2384
12.35		74.7452	68.8565	64.9351	64.488	99.527
12.3667		74.8939	69.0052	65.0837	64.558	99.8157
12.4		74.9039	69.0152	65.0937	64.6279	100.104
12.4167		74.9138	69.0251	65.1037	64.6978	100.393
12.4333		74.9239	69.0352	65.1137	64.7078	100.403
12.45		75.0725	69.1838	65.2623	64.7178
12.4667		75.2211	69.3324	65.4109	64.7278
12.5		75.3697	69.481	65.5596	64.7977
12.5167		75.5184	69.6297	65.7082	64.8677
12.5333		75.5284	69.6397	65.7182	64.9376
12.55		75.5384	69.6497	65.7282	65.0075
12.5667		75.5484	69.6597	65.7382	65.0774
12.6		75.697	69.8083	65.8868	65.0875
12.6167		75.8456	69.9569	66.0354	65.0974
12.6333		75.9942	70.1055	66.184	65.1075
12.65		76.1429	70.2542	66.3327	65.1774
12.6667		76.1529	70.2642	66.3427	65.2473
12.7		76.1629	70.2742	66.3527	65.3172
12.7167		76.1729	70.2842	66.3627	65.3872
12.7333		76.3215	70.4328	66.5113	65.4571
12.75		76.4701	70.5814	66.6599	65.4671
12.7667		76.6188	70.7301	66.8085	65.4771
12.8		76.7674	70.8787	66.9571	65.4871
12.8167		76.7774	70.8887	66.9671	65.557
12.8333		76.7874	70.8987	66.9771	65.6269
12.85		76.7974	70.9087	66.9871	65.6969
12.8667		76.946	71.0573	67.1357	65.7668
12.9		77.0946	71.2059	67.2844	65.8367
12.9167		77.2433	71.3546	67.433	65.8467
12.9333		77.3919	71.5032	67.5816	65.8567
12.95		77.4019	71.5132	67.5916	65.8667
12.9667		77.4119	71.5232	67.6016	65.9366
13		77.4219	71.5332	67.6116	66.0066
13.0167		77.5705	71.6818	67.7602	66.0765
13.0333		77.7191	71.8304	67.9088	66.1464
13.05		77.8677	71.9791	68.0574	66.2164
13.0667		78.0164	72.1277	68.206	66.2263
13.1		78.0264	72.1377	68.216	66.2364
13.1167		78.0364	72.1477	68.226	66.2464
13.1333		78.0464	72.1577	68.236	66.3163
13.15		78.195	72.3063	68.3846	66.3862
13.1667		78.3436	72.4549	68.5332	66.4561
13.2		78.4922	72.6035	68.6818	66.526
13.2167		78.6408	72.7522	68.8304	66.596
13.2333		78.6508	72.7622	68.8405	66.606
13.25		78.6608	72.7722	68.8504	66.616
13.2667		78.6708	72.7822	68.8605	66.626
13.3		78.8195	72.9308	69.0091	66.6959
13.3167		78.9681	73.0794	69.1577	66.7658
13.3333		79.1167	73.228	69.3063	66.8357
13.35		79.2653	73.3766	69.4549	66.9057
13.3667		79.2753	73.3866	69.4649	66.9756
13.4		79.2853	73.3966	69.4749	66.9856
13.4167		79.2953	73.4066	69.4849	66.9956
13.4333		79.4439	73.5553	69.6335	67.0056
13.45		79.5926	73.7039	69.7821	67.0755
13.4667		79.7412	73.8525	69.9307	67.1454
13.5		79.8898	74.0011	70.0793	67.2154
13.5167		79.8998	74.0111	70.0893	67.2853
13.5333		79.9098	74.0211	70.0993	67.3552
13.55		79.9198	74.0311	70.1093	67.3652
13.5667		80.0684	74.1797	70.2579	67.3752
13.6		80.217	74.3283	70.4065	67.3852
13.6167		80.3656	74.477	70.5551	67.4551
13.6333		80.5142	74.6256	70.7037	67.525
13.65		80.5242	74.6356	70.7137	67.595
13.6667		80.5342	74.6456	70.7237	67.6649
13.7		80.5442	74.6556	70.7337	67.7348
13.7167		80.6928	74.8042	70.8823	67.7448
13.7333		80.8415	74.9528	71.0309	67.7548
13.75		80.9901	75.1014	71.1795	67.7648
13.7667		81.1387	75.25	71.3281	67.8347
13.8		81.1487	75.26	71.3381	67.9047
13.8167		81.1587	75.27	71.3481	67.9746
13.8333		81.1687	75.28	71.3581	68.0445
13.85		81.3173	75.4286	71.5067	68.1144
13.8667		81.4659	75.5773	71.6553	68.1244
13.9		81.6145	75.7259	71.8039	68.1344
13.9167		81.7631	75.8745	71.9525	68.1444
13.9333		81.7731	75.8845	71.9625	68.2143
13.95		81.7831	75.8945	71.9725	68.2843
13.9667		81.7931	75.9045	71.9825	68.3542
14		81.9417	76.0531	72.1311	68.4241
14.0167		82.0903	76.2017	72.2797	68.494
14.0333		82.2389	76.3503	72.4283	68.504
14.05		82.3875	76.4989	72.5769	68.514
14.0667		82.3975	76.5089	72.5869	68.524
14.1		82.4075	76.5189	72.5969	68.5939
14.1167		82.4175	76.5289	72.6069	68.6638
14.1333		82.5661	76.6775	72.7555	68.7338
14.15		82.7147	76.8261	72.9041	68.8037
14.1667		82.8633	76.9747	73.0527	68.8736
14.2		83.012	77.1233	73.2013	68.8836
14.2167		83.022	77.1333	73.2113	68.8936
14.2333		83.032	77.1433	73.2213	68.9036
14.25		83.042	77.1533	73.2313	68.9735
14.2667		83.1906	77.302	73.3799	69.0435
14.3		83.3392	77.4506	73.5285	69.1134
14.3167		83.4878	77.5992	73.6771	69.1833
14.3333		83.6364	77.7478	73.8257	69.2532
14.35		83.6464	77.7578	73.8357	69.2632
14.3667		83.6564	77.7678	73.8457	69.2732
14.4		83.6664	77.7778	73.8557	69.2832
14.4167		83.815	77.9264	74.0043	69.3531
14.4333		83.9636	78.075	74.1529	69.423
14.45		84.1122	78.2236	74.3015	69.493
14.4667		84.2608	78.3722	74.4501	69.5629
14.5		84.2708	78.3822	74.4601	69.6328
14.5167		84.2808	78.3922	74.4701	69.6428
14.5333		84.2908	78.4022	74.4801	69.6528
14.55		84.4394	78.5508	74.6286	69.6628
14.5667		84.588	78.6994	74.7772	69.7327
14.6		84.7365	78.848	74.9258	69.8026
14.6167		84.8851	78.9966	75.0744	69.8726
14.6333		84.8952	79.0066	75.0844	69.9425
14.65		84.9052	79.0166	75.0944	70.0124
14.6667		84.9151	79.0266	75.1044	70.0224
14.7		85.0637	79.1752	75.253	70.0324
14.7167		85.2123	79.3238	75.4016	70.0424
14.7333		85.3609	79.4724	75.5502	70.1123
14.75		85.5095	79.621	75.6988	70.1822
14.7667		85.5195	79.631	75.7088	70.2521
14.8		85.5295	79.641	75.7188	70.3221
14.8167		85.5395	79.651	75.7288	70.392
14.8333		85.6881	79.7996	75.8774	70.402
14.85		85.8367	79.9482	76.0259	70.412
14.8667		85.9853	80.0968	76.1745	70.422
14.9		86.1339	80.2454	76.3231	70.4919
14.9167		86.1439	80.2554	76.3331	70.5618
14.9333		86.1539	80.2654	76.3431	70.6317
14.95		86.1639	80.2754	76.3531	70.7016
14.9667		86.3125	80.424	76.5017	70.7715
15		86.4611	80.5726	76.6503	70.7815
15.0167		86.6097	80.7212	76.7989	70.7915
15.0333		86.7583	80.8698	76.9474	70.8015
15.05		86.7682	80.8798	76.9574	70.8714
15.0667		86.7782	80.8898	76.9674	70.9414
15.1		86.7883	80.8998	76.9774	71.0113
15.1167		86.9368	81.0484	77.126	71.0812
15.1333		87.0854	81.197	77.2746	71.1511
15.15		87.234	81.3456	77.4232	71.1611
15.1667		87.3826	81.4942	77.5718	71.1711
15.2		87.3926	81.5042	77.5818	71.1811
15.2167		87.4026	81.5142	77.5918	71.251
15.2333		87.4126	81.5242	77.6018	71.3209
15.25		87.5612	81.6727	77.7503	71.3908
15.2667		87.7098	81.8213	77.8989	71.4608
15.3		87.8584	81.9699	78.0475	71.5307
15.3167		88.007	82.1185	78.1961	71.5407
15.3333		88.0169	82.1285	78.2061	71.5507
15.35		88.0269	82.1385	78.2161	71.5607
15.3667		88.037	82.1485	78.2261	71.6306
15.4		88.1855	82.2971	78.3747	71.7005
15.4167		88.3341	82.4457	78.5233	71.7704
15.4333		88.4827	82.5943	78.6718	71.8403
15.45		88.6313	82.7429	78.8204	71.9102
15.4667		88.6413	82.7529	78.8304	71.9202
15.5		88.6513	82.7629	78.8404	71.9302
15.5167		88.6613	82.7729	78.8504	71.9402
15.5333		88.8099	82.9215	78.999	72.0101
15.55		88.9584	83.0701	79.1475	72.08
15.5667		89.107	83.2186	79.2961	72.1499
15.6		89.2556	83.3672	79.4447	72.2198
15.6167		89.2656	83.3772	79.4547	72.2898
15.6333		89.2756	83.3872	79.4647	72.2998
15.65		89.2856	83.3972	79.4747	72.3098
15.6667		89.4342	83.5458	79.6233	72.3198
15.7		89.5828	83.6944	79.7719	72.3897
15.7167		89.7314	83.843	79.9204	72.4596
15.7333		89.8799	83.9916	80.069	72.5295
15.75		89.8899	84.0016	80.079	72.5994
15.7667		89.8999	84.0116	80.089	72.6693
15.8		89.9099	84.0216	80.099	72.6793
15.8167		90.0585	84.1702	80.2476	72.6893
15.8333		90.2071	84.3188	80.3962	72.6993
15.85		90.3557	84.4673	80.5447	72.7692
15.8667		90.5042	84.6159	80.6933	72.8391
15.9		90.5142	84.6259	80.7033	72.909
15.9167		90.5242	84.6359	80.7133	72.9789
15.9333		90.5342	84.6459	80.7233	73.0489
15.95		90.6828	84.7945	80.8719	73.0589
15.9667		90.8314	84.9431	81.0204	73.0688
16		90.98	85.0917	81.169	73.0789
16.0167		91.1285	85.2403	81.3176	73.1488
16.0333		91.1385	85.2503	81.3276	73.2187
16.05		91.1485	85.2603	81.3376	73.2886
16.0667		91.1585	85.2703	81.3476	73.3585
16.1		91.3071	85.4188	81.4962	73.4284
16.1167		91.4557	85.5674	81.6447	73.4384
16.1333		91.6043	85.716	81.7933	73.4484
16.15		91.7528	85.8646	81.9419	73.4584
16.1667		91.7628	85.8746	81.9519	73.5283
16.2		91.7728	85.8846	81.9619	73.5982
16.2167		91.7828	85.8946	81.9719	73.6681
16.2333		91.9314	86.0432	82.1204	73.738
16.25		92.08	86.1917	82.269	73.8079
16.2667		92.2285	86.3403	82.4176	73.8179
16.3		92.3771	86.4889	82.5661	73.8279
16.3167		92.3871	86.4989	82.5761	73.8379
16.3333		92.3971	86.5089	82.5861	73.9078
16.35		92.4071	86.5189	82.5961	73.9777
16.3667		92.5557	86.6675	82.7447	74.0476
16.4		92.7043	86.8161	82.8933	74.1175
16.4167		92.8528	86.9646	83.0418	74.1874
16.4333		93.0014	87.1132	83.1904	74.1974
16.45		93.0114	87.1232	83.2004	74.2074
16.4667		93.0214	87.1332	83.2104	74.2174
16.5		93.0314	87.1432	83.2204	74.2874
16.5167		93.18	87.2918	83.369	74.3572
16.5333		93.3285	87.4404	83.5175	74.4272
16.55		93.4771	87.5889	83.6661	74.4971
16.5667		93.6257	87.7375	83.8147	74.567
16.6		93.6357	87.7475	83.8247	74.577
16.6167		93.6457	87.7575	83.8346	74.587
16.6333		93.6557	87.7675	83.8447	74.597
16.65		93.8042	87.9161	83.9932	74.6669
16.6667		93.9528	88.0647	84.1418	74.7368
16.7		94.1014	88.2132	84.2903	74.8067
16.7167		94.2499	88.3618	84.4389	74.8766
16.7333		94.2599	88.3718	84.4489	74.9465
16.75		94.2699	88.3818	84.4589	74.9565
16.7667		94.2799	88.3918	84.4689	74.9665
16.8		94.4285	88.5404	84.6175	74.9765
16.8167		94.5771	88.6889	84.766	75.0464
16.8333		94.7256	88.8375	84.9146	75.1163
16.85		94.8742	88.9861	85.0631	75.1862
16.8667		94.8842	88.9961	85.0731	75.2561
16.9		94.8942	89.0061	85.0831	75.326
16.9167		94.9042	89.0161	85.0931	75.336
16.9333		95.0528	89.1646	85.2417	75.346
16.95		95.2013	89.3132	85.3903	75.356
16.9667		95.3499	89.4618	85.5388	75.4259
17		95.4984	89.6103	85.6874	75.4958
17.0167		95.5084	89.6204	85.6974	75.5657
17.0333		95.5184	89.6304	85.7074	75.6356
17.05		95.5284	89.6403	85.7174	75.7055
17.0667		95.677	89.7889	85.8659	75.7155
17.1		95.8256	89.9375	86.0145	75.7255
17.1167		95.9741	90.0861	86.163	75.7355
17.1333		96.1227	90.2346	86.3116	75.8054
17.15		96.1327	90.2446	86.3216	75.8753
17.1667		96.1427	90.2546	86.3316	75.9452
17.2		96.1527	90.2646	86.3416	76.0151
17.2167		96.3012	90.4132	86.4901	76.085
17.2333		96.4498	90.5617	86.6387	76.095
17.25		96.5983	90.7103	86.7873	76.105
17.2667		96.7469	90.8589	86.9358	76.115
17.3		96.7569	90.8689	86.9458	76.1849
17.3167		96.7669	90.8789	86.9558	76.2548
17.3333		96.7769	90.8889	86.9658	76.3247
17.35		96.9255	91.0374	87.1144	76.3946
17.3667		97.074	91.186	87.2629	76.4645
17.4		97.2226	91.3346	87.4115	76.4745
17.4167		97.3711	91.4831	87.56	76.4845
17.4333		97.3811	91.4931	87.57	76.4945
17.45		97.3911	91.5031	87.58	76.5644
17.4667		97.4011	91.5131	87.59	76.6343
17.5		97.5497	91.6617	87.7386	76.7042
17.5167		97.6982	91.8102	87.8871	76.7741
17.5333		97.8468	91.9588	88.0357	76.844
17.55		97.9953	92.1074	88.1842	76.854
17.5667		98.0053	92.1174	88.1942	76.864
17.6		98.0153	92.1274	88.2042	76.874
17.6167		98.0253	92.1374	88.2142	76.9439
17.6333		98.1739	92.2859	88.3628	77.0138
17.65		98.3224	92.4345	88.5113	77.0837
17.6667		98.471	92.583	88.6599	77.1535
17.7		98.6196	92.7316	88.8084	77.2234
17.7167		98.6295	92.7416	88.8184	77.2334
17.7333		98.6395	92.7516	88.8284	77.2434
17.75		98.6496	92.7616	88.8384	77.2534
17.7667		98.7981	92.9102	88.987	77.3233
17.8		98.9466	93.0587	89.1355	77.3932
17.8167		99.0952	93.2073	89.284	77.4631
17.8333		99.2437	93.3558	89.4326	77.533
17.85		99.2537	93.3658	89.4426	77.6029
17.8667		99.2637	93.3758	89.4526	77.6129
17.9		99.2737	93.3858	89.4626	77.6229
17.9167		99.4223	93.5344	89.6111	77.6329
17.9333		99.5708	93.6829	89.7597	77.7028
17.95		99.7194	93.8315	89.9082	77.7727
17.9667		99.8679	93.9801	90.0568	77.8426
18		99.8779	93.99	90.0668	77.9125
18.0167		99.8879	94.0001	90.0768	77.9824
18.0333		99.8979	94.0101	90.0868	77.9924
18.05		99.9079	94.1586	90.2353	78.0024
18.0667		99.9179	94.3072	90.3839	78.0124
18.1		99.9279	94.4557	90.5324	78.0823
18.1167		99.9379	94.6043	90.6809	78.1522
18.1333		99.9479	94.6143	90.6909	78.2221
18.15		99.9579	94.6243	90.7009	78.292
18.1667		99.9679	94.6343	90.7109	78.3619
18.2		99.9779	94.7828	90.8595	78.3719
18.2167			94.9314	91.008	78.3819
18.2333			95.0799	91.1566	78.3919
18.25			95.2285	91.3051	78.4617
18.2667			95.2385	91.3151	78.5316
18.3			95.2485	91.3251	78.6015
18.3167			95.2585	91.3351	78.6714
18.3333			95.407	91.4836	78.7413
18.35			95.5556	91.6322	78.7513
18.3667			95.7041	91.7807	78.7613
18.4			95.8527	91.9293	78.7713
18.4167			95.8627	91.9393	78.8412
18.4333			95.8727	91.9493	78.9111
18.45			95.8827	91.9593	78.981
18.4667			96.0312	92.1078	79.0509
18.5			96.1798	92.2563	79.1208
18.5167			96.3283	92.4049	79.1308
18.5333			96.4769	92.5534	79.1408
18.55			96.4869	92.5634	79.1508
18.5667			96.4969	92.5734	79.2207
18.6			96.5069	92.5834	79.2906
18.6167			96.6554	92.7319	79.3605
18.6333			96.804	92.8805	79.4304
18.65			96.9525	93.029	79.5002
18.6667			97.1011	93.1775	79.5102
18.7			97.1111	93.1875	79.5202
18.7167			97.121	93.1975	79.5302
18.7333			97.1311	93.2075	79.6001
18.75			97.2796	93.3561	79.67
18.7667			97.4281	93.5046	79.7399
18.8			97.5767	93.6531	79.8098
18.8167			97.7252	93.8017	79.8797
18.8333			97.7352	93.8117	79.8897
18.85			97.7452	93.8217	79.8997
18.8667			97.7552	93.8317	79.9097
18.9			97.9038	93.9802	79.9796
18.9167			98.0523	94.1287	80.0495
18.9333			98.2009	94.2773	80.1194
18.95			98.3494	94.4258	80.1893
18.9667			98.3594	94.4358	80.2591
19			98.3694	94.4458	80.2691
19.0167			98.3794	94.4558	80.2791
19.0333			98.5279	94.6043	80.2891
19.05			98.6765	94.7528	80.359
19.0667			98.825	94.9014	80.4289
19.1			98.9736	95.0499	80.4988
19.1167			98.9835	95.0599	80.5687
19.1333			98.9935	95.0699	80.6386
19.15			99.0036	95.0799	80.6486
19.1667			99.1521	95.2284	80.6586
19.2			99.3006	95.377	80.6686
19.2167			99.4492	95.5255	80.7385
19.2333			99.5977	95.674	80.8084
19.25			99.6077	95.684	80.8782
19.2667			99.6177	95.694	80.9481
19.3			99.6277	95.704	81.018
19.3167			99.7762	95.8525	81.028
19.3333			99.9248	96.0011	81.038
19.35			100.073	96.1496	81.048
19.3667				96.2981	81.1179
19.4				96.3081	81.1878
19.4167				96.3181	81.2577
19.4333				96.3281	81.3276
19.45				96.4766	81.3975
19.4667				96.6252	81.4074
19.5				96.7737	81.4175
19.5167				96.9222	81.4274
19.5333				96.9322	81.4973
19.55				96.9422	81.5672
19.5667				96.9522	81.6371
19.6				97.1007	81.707
19.6167				97.2492	81.7769
19.6333				97.3978	81.7869
19.65				97.5463	81.7969
19.6667				97.5563	81.8069
19.7				97.5663	81.8768
19.7167				97.5763	81.9466
19.7333				97.7248	82.0165
19.75				97.8733	82.0864
19.7667				98.0218	82.1563
19.8				98.1703	82.1663
19.8167				98.1803	82.1763
19.8333				98.1903	82.1863
19.85				98.2003	82.2562
19.8667				98.3489	82.3261
19.9				98.4974	82.3959
19.9167				98.5074	82.4658
19.9333				98.5174	82.5357
19.95				98.5274	82.5457
19.9667				98.6759	82.5557
20				98.8244	82.5657
20.0167				98.9729	82.6356
20.0333				99.1214	82.7055
20.05				99.1314	82.7754
20.0667				99.1414	82.8452
20.1				99.1514	82.9151
20.1167				99.2999	82.9251
20.1333				99.4485	82.9351
20.15				99.597	82.9451
20.1667				99.7455	83.015
20.1833					83.0849
20.2					83.1548
20.2167					83.2246
20.2333					83.2945
20.25					83.3045
20.2667					83.3145
20.2833					83.3245
20.3					83.3944
20.3167					83.4643
20.3333					83.5342
20.35					83.604
20.3667					83.6739
20.3833					83.6839
20.4					83.6939
20.4167					83.7039
20.4333					83.7738
20.45					83.8437
20.4667					83.9136
20.4833					83.9834
20.5					84.0533
20.5167					84.0633
20.5333					84.0733
20.55					84.0833
20.5667					84.1532
20.5833					84.2231
20.6					84.2929
20.6167					84.3628
20.6333					84.4327
20.65					84.4427
20.6667					84.4527
20.6833					84.4627
20.7					84.5326
20.7167					84.6025
20.7333					84.6723
20.75					84.7422
20.7667					84.8121
20.7833					84.8221
20.8					84.8321
20.8167					84.8421
20.8333					84.912
20.85					84.9818
20.8667					85.0517
20.8833					85.1216
20.9					85.1915
20.9167					85.2014
20.9333					85.2114
20.95					85.2215
20.9667					85.2913
20.9833					85.3612
21					85.4311
21.0167					85.501
21.0333					85.5708
21.05					85.5808
21.0667					85.5908
21.0833					85.6008
21.1					85.6707
21.1167					85.7406
21.1333					85.8105
21.15					85.8803
21.1667					85.9502
21.1833					85.9602
21.2					85.9702
21.2167					85.9802
21.2333					86.0501
21.25					86.12
21.2667					86.1898
21.2833					86.2597
21.3					86.3296
21.3167					86.3396
21.3333					86.3496
21.35					86.3596
21.3667					86.4294
21.3833					86.4993
21.4					86.5692
21.4167					86.6391
21.4333					86.7089
21.45					86.7189
21.4667					86.7289
21.4833					86.7389
21.5					86.8088
21.5167					86.8787
21.5333					86.9485
21.55					87.0184
21.5667					87.0883
21.5833					87.0983
21.6					87.1083
21.6167					87.1183
21.6333					87.1882
21.65					87.258
21.6667					87.3279
21.6833					87.3978
21.7					87.4677
21.7167					87.4776
21.7333					87.4877
21.75					87.4976
21.7667					87.5675
21.7833					87.6374
21.8					87.7073
21.8167					87.7771
21.8333					87.847
21.85					87.857
21.8667					87.867
21.8833					87.877
21.9					87.9469
21.9167					88.0167
21.9333					88.0866
21.95					88.1565
21.9667					88.2263
21.9833					88.2363
22					88.2463
22.0167					88.2563
22.0333					88.3262
22.05					88.3961
22.0667					88.4659
22.0833					88.5358
22.1					88.6057
22.1167					88.6157
22.1333					88.6257
22.15					88.6357
22.1667					88.7055
22.1833					88.7754
22.2					88.8453
22.2167					88.9151
22.2333					88.985
22.25					88.995
22.2667					89.005
22.2833					89.015
22.3					89.0849
22.3167					89.1547
22.3333					89.2246
22.35					89.2945
22.3667					89.3643
22.3833					89.3743
22.4					89.3843
22.4167					89.3943
22.4333					89.4642
22.45					89.5341
22.4667					89.6039
22.4833					89.6738
22.5					89.7437
22.5167					89.7537
22.5333					89.7637
22.55					89.7737
22.5667					89.8435
22.5833					89.9134
22.6					89.9833
22.6167					90.0531
22.6333					90.123
22.65					90.133
22.6667					90.143
22.6833					90.153
22.7					90.2229
22.7167					90.2927
22.7333					90.3027
22.75					90.3127
22.7667					90.3227
22.7833					90.3926
22.8					90.4625
22.8167					90.5323
22.8333					90.6022
22.85					90.672
22.8667					90.6821
22.8833					90.692
22.9					90.702
22.9167					90.7719
22.9333					90.8418
22.95					90.9116
22.9667					90.9815
22.9833					91.0514
23					91.0614
23.0167					91.0714
23.0333					91.0814
23.05					91.1512
23.0667					91.2211
23.0833					91.2909
23.1					91.3608
23.1167					91.4307
23.1333					91.4407
23.15					91.4507
23.1667					91.4607
23.1833					91.5305
23.2					91.6004
23.2167					91.6702
23.2333					91.7401
23.25					91.81
23.2667					91.82
23.2833					91.83
23.3					91.84
23.3167					91.9098
23.3333					91.9797
23.35					92.0495
23.3667					92.1194
23.3833					92.1893
23.4					92.1993
23.4167					92.2093
23.4333					92.2193
23.45					92.2891
23.4667					92.359
23.4833					92.4288
23.5					92.4987
23.5167					92.5686
23.5333					92.5786
23.55					92.5886
23.5667					92.5986
23.5833					92.6684
23.6					92.7383
23.6167					92.8081
23.6333					92.878
23.65					92.9479
23.6667					92.9579
23.6833					92.9679
23.7					92.9779
23.7167					93.0477
23.7333					93.1176
23.75					93.1874
23.7667					93.2573
23.7833					93.3272
23.8					93.3371
23.8167					93.3471
23.8333					93.3572
23.85					93.427
23.8667					93.4969
23.8833					93.5667
23.9					93.6366
23.9167					93.7064
23.9333					93.7164
23.95					93.7264
23.9667					93.7364
23.9833					93.8063
24					93.8761
24.0167					93.946
24.0333					94.0158
24.05					94.0857
24.0667					94.0957
24.0833					94.1057
24.1					94.1157
24.1167					94.1856
24.1333					94.2554
24.15					94.3253
24.1667					94.3951
24.1833					94.465
24.2					94.475
24.2167					94.485
24.2333					94.495
24.25					94.5648
24.2667					94.6347
24.2833					94.7045
24.3					94.7744
24.3167					94.8442
24.3333					94.8542
24.35					94.8642
24.3667					94.8742
24.3833					94.9441
24.4					95.0139
24.4167					95.0838
24.4333					95.1536
24.45					95.2235
24.4667					95.2335
24.4833					95.2435
24.5					95.2535
24.5167					95.3233
24.5333					95.3932
24.55					95.463
24.5667					95.5329
24.5833					95.6027
24.6					95.6127
24.6167					95.6227
24.6333					95.6327
24.65					95.7026
24.6667					95.7724
24.6833					95.8423
24.7					95.9121
24.7167					95.982
24.7333					95.992
24.75					96.002
24.7667					96.012
24.7833					96.0818
24.8					96.1517
24.8167					96.2215
24.8333					96.2914
24.85					96.3612
24.8667					96.3712
24.8833					96.3812
24.9					96.3912
24.9167					96.4611
24.9333					96.5309
24.95					96.6007
24.9667					96.6706
24.9833					96.7404
25					96.7504
25.0167					96.7604
25.0333					96.7704
25.05					96.8403
25.0667					96.9101
25.0833					96.98
25.1					97.0498
25.1167					97.1197
25.1333					97.1297
25.15					97.1397
25.1667					97.1497
25.1833					97.2195
25.2					97.2893
25.2167					97.3592
25.2333					97.429
25.25					97.4989
25.2667					97.5089
25.2833					97.5189
25.3					97.5289
25.3167					97.5987
25.3333					97.6686
25.35					97.7384
25.3667					97.8083
25.3833					97.8781
25.4					97.8881
25.4167					97.8981
25.4333					97.9081
25.45					97.9779
25.4667					98.0478
25.4833					98.0578
25.5					98.0678
25.5167					98.0778
25.5333					98.1476
25.55					98.2175
25.5667					98.2873
25.5833					98.3571
25.6					98.427
25.6167					98.437
25.6333					98.447
25.65					98.457
25.6667					98.5268
25.6833					98.5967
25.7					98.6665
25.7167					98.7363
25.7333					98.8062
25.75					98.8162
25.7667					98.8262
25.7833					98.8362
25.8					98.906
25.8167					98.9759
25.8333					99.0457
25.85					99.1155
25.8667					99.1854
25.8833					99.1954
25.9					99.2054
25.9167					99.2154
25.9333					99.2852
25.95					99.355
25.9667					99.4249
25.9833					99.4947
26					99.5645
26.0167					99.5746
26.0333					99.5845
26.05					99.5945
26.0667					99.6644
26.0833					99.7342
26.1					99.8041
26.1167					99.8739
26.1333					99.9437
26.15					99.9537
26.1667					99.9637
26.1833					99.9737
26.2					100.044
